# Supplementary material for: Try Before You Buy: Are There Benefits to a Random Trial Period before Students Choose Their Collaborative Teams?
Source: Atypon-hosted journal article supplement (doi:10.1187/cbe.23-01-0011), 2023-12-12
Supplement: combinedsupmats.pdf [file combinedsupmats.pdf]

# Supplemental Material

*CBE—Life Sciences Education*

Samudra *et al.*

## Supplemental data

Contents:

| <b>Page no</b> | <b>Figure/Table no</b> | <b>Description</b>                                                                                                                                           |
|----------------|------------------------|--------------------------------------------------------------------------------------------------------------------------------------------------------------|
| 2              | Figure S1              | Laboratory layout for BIOL1108L                                                                                                                              |
| 2              | Figure S2              | Analysis of preliminary qualitative data to understand students' perceptions of good and poor group members                                                  |
| 3              | Table S1               | Demographics of students- Details of Ethnic/Racial distribution                                                                                              |
| 3-4            | Table S2               | Qualitative analysis of the lab sections for homophily observed with respect to Race/Ethnicity in week 5                                                     |
| 4-5            | Table S3               | Qualitative analysis of the lab sections with differential homophily observed with respect to pre-class friend status and biological sex in week 5           |
| 6              | Table S4               | Model selection for the effect of structure and unstructured lab settings as a predictor for positive or negative outcomes for groups                        |
| 7-8            | Table S5               | Mixed Level model examining the effect of structure and unstructured lab settings on the satisfaction, conflict, and communication frequency scores          |
| 8              | Table S6               | Mean, SD, and median values for satisfaction, discussion, conflict scores, and final grades in structured and unstructured labs                              |
| 9              | Table S7               | Model selection for the effect of structure and unstructured lab settings as a predictor for communication frequency and shared workload during weeks 1 to 4 |
| 9              | Table S8               | Mixed Level model examining the effect of structure and unstructured lab settings on the communication frequency and shared workload during weeks 1 to 4     |
| 10             | Table S9               | Mean, SD, and median values for communication frequencies in structured and unstructured labs                                                                |
| 10             | Table S10              | Mean, SD, and median values for shared workload in structured and unstructured labs over the period of the first four weeks                                  |
| 10-14          | Appendix 1             | Survey items                                                                                                                                                 |

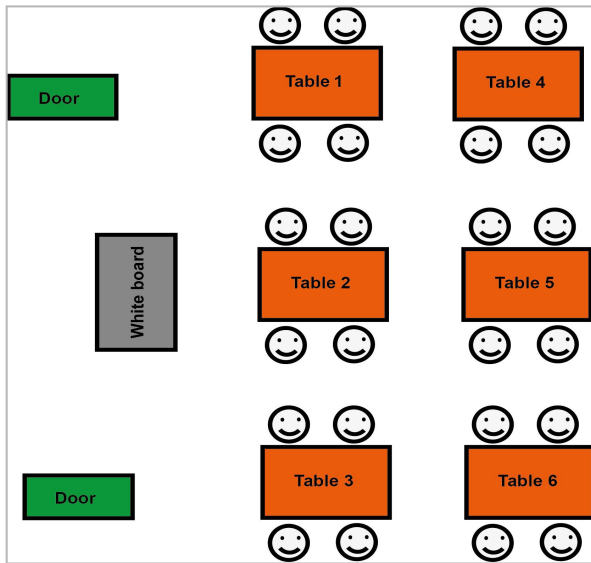

**Figure S1: Laboratory layout for BIOL1108L**

Each section had a maximum of 24 students and one GLA/instructor.

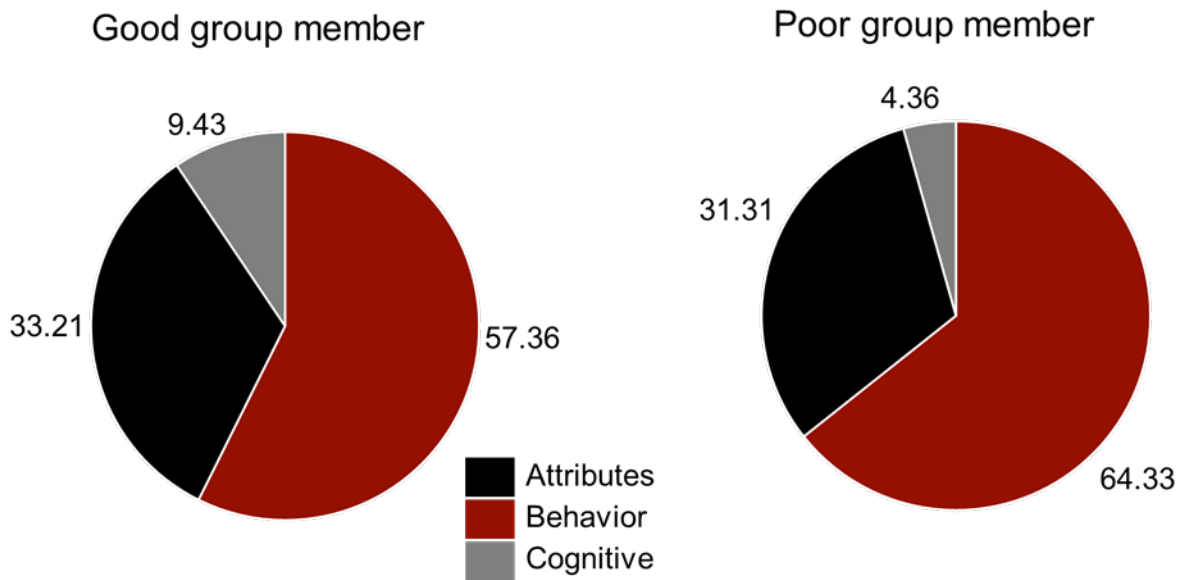

**Figure S2:** Analysis of preliminary qualitative data from Summer 2018 [to understand](#) students' perceptions of good and poor group members. Students defined "good" and "poor" as they perceived them without any definition or specification provided in the survey questions asked. The completion rate for all of the surveys was 84.8 %. Good group member codes (n=530) and Poor group member codes (n=527) were calculated as the frequency of responses per code over the total number of responses for all four surveys (%).

| <b>Table S1 - Demographics of students- Details of Ethnic/Racial distribution</b> |                                                   |                                       |                                         |
|-----------------------------------------------------------------------------------|---------------------------------------------------|---------------------------------------|-----------------------------------------|
| Ethnicity/Race                                                                    |                                                   | Number of students in Structured Labs | Number of students in Unstructured Labs |
| White (non-URM)                                                                   |                                                   | 194                                   | 200                                     |
| Asian (non-URM)                                                                   | Asian Indian                                      | 41                                    | 20                                      |
|                                                                                   | Chinese                                           | 6                                     | 10                                      |
|                                                                                   | Korean                                            | 4                                     | 8                                       |
|                                                                                   | Vietnamese                                        | 8                                     | 12                                      |
|                                                                                   | Filipino                                          | 2                                     | 4                                       |
|                                                                                   | Japanese                                          | 1                                     | 0                                       |
| URM                                                                               | African American/Black                            | 32                                    | 44                                      |
|                                                                                   | Hispanic/Latinx                                   | 17                                    | 19                                      |
|                                                                                   | Native American/Pacific Islanders/ Alaska Natives | 0                                     | 1                                       |

| <b>Table S2: Qualitative analysis of the lab sections for homophily observed with respect to Race/Ethnicity in week 5</b> |                              |                                |                                                                                                                        |                                                                                                                          |
|---------------------------------------------------------------------------------------------------------------------------|------------------------------|--------------------------------|------------------------------------------------------------------------------------------------------------------------|--------------------------------------------------------------------------------------------------------------------------|
| Lab ID                                                                                                                    | Total number of URM students | Total number of Asian students | Number of groups with URM students working together with no pre-class friend status (at least two students in a group) | Number of groups with Asian students working together with no pre-class friend status (at least two students in a group) |
| <b>Unstructured lab sections</b>                                                                                          |                              |                                |                                                                                                                        |                                                                                                                          |
| 11                                                                                                                        | 4                            | 1                              | 1                                                                                                                      | 0                                                                                                                        |
| 21                                                                                                                        | 7                            | 3                              | 2                                                                                                                      | 0                                                                                                                        |
| 31                                                                                                                        | 5                            | 2                              | 1                                                                                                                      | 0                                                                                                                        |
| 41                                                                                                                        | 2                            | 3                              | 0                                                                                                                      | 1                                                                                                                        |
| 61                                                                                                                        | 5                            | 5                              | 1                                                                                                                      | 1                                                                                                                        |
| 91                                                                                                                        | 6                            | 2                              | 1                                                                                                                      | 1                                                                                                                        |

|                                |   |   |   |   |
|--------------------------------|---|---|---|---|
| 101                            | 6 | 4 | 0 | 0 |
| 121                            | 5 | 3 | 0 | 0 |
| 131                            | 4 | 2 | 1 | 0 |
| 141                            | 5 | 2 | 0 | 0 |
| 151                            | 1 | 3 | 0 | 0 |
| 171                            | 4 | 7 | 1 | 2 |
| 181                            | 4 | 3 | 0 | 0 |
| <b>Structured lab sections</b> |   |   |   |   |
| 12                             | 3 | 4 | 0 | 0 |
| 22                             | 3 | 3 | 1 | 1 |
| 32                             | 0 | 3 | 0 | 0 |
| 42                             | 1 | 4 | 0 | 0 |
| 62                             | 3 | 7 | 0 | 1 |

**Table S3: Qualitative analysis of the lab sections with differential homophily observed with respect to pre-class friend status and biological sex in week 5**

| Lab ID                           | Total number of students (Female/Male ratio) | Number of groups with pre-class friends (Out of a total of 6) | Number of groups where 2 students were pre-class friends and were |           |                            |
|----------------------------------|----------------------------------------------|---------------------------------------------------------------|-------------------------------------------------------------------|-----------|----------------------------|
|                                  |                                              |                                                               | All females                                                       | All males | Different biological sexes |
| <b>Unstructured lab sections</b> |                                              |                                                               |                                                                   |           |                            |
| 11                               | 22 (1.63)                                    | 3                                                             | 2                                                                 | 1         | -                          |
| 21                               | 19 (2.8)                                     | 2                                                             | 1                                                                 | -         | 1                          |
| 31                               | 24 (3.8)                                     | 3                                                             | 2                                                                 | -         | 1                          |
| 41                               | 19 (5.33)                                    | 4                                                             | 2                                                                 | -         | 2                          |
| 61                               | 22 (1.44)                                    | 2                                                             | 1                                                                 | -         | 1                          |

|                                |           |   |   |   |   |
|--------------------------------|-----------|---|---|---|---|
| 91                             | 22 (2.14) | 1 | - | - | 1 |
| 101                            | 24 (5)    | 4 | 2 | - | 2 |
| 121                            | 24 (1.6)  | 4 | 2 | - | 2 |
| 141                            | 22(2.14)  | 2 | 1 | - | 1 |
| 151                            | 23 (1.55) | 3 | 1 | - | 2 |
| 171                            | 24 (2)    | 4 | 1 | - | 3 |
| 181                            | 20(1.86)  | 2 | 2 | - | - |
| <b>Structured lab sections</b> |           |   |   |   |   |
| 12                             | 21 (0.91) | 2 | 1 | - | 1 |
| 22                             | 20 (3)    | 2 | - | - | 2 |
| 32                             | 22(2.14)  | 4 | 1 | - | 3 |
| 42                             | 23(2.14)  | 2 | 1 | - | 1 |
| 62                             | 20 (1.71) | 2 | - | - | 2 |
| 92                             | 22 (2.14) | 4 | 2 | - | 2 |
| 102                            | 19 (1.71) | 2 | 1 | 1 | - |
| 122                            | 22 (3.2)  | 3 | 1 | - | 3 |
| 132                            | 18 (5)    | 4 | 2 | - | 2 |
| 142                            | 24 (1.67) | 3 | 1 | - | 2 |
| 152                            | 23 (1.88) | 2 | 1 | 1 | - |
| 182                            | 21 (1.63) | 3 | 2 | 1 | - |

**Table S4: Model selection for examining the effect of fixed and random variables as a predictor for positive or negative outcomes for groups**

| <b>Model Description</b>                                                                                               | <b>Outcomes- Week 5-7<br/>(AIC values)</b>     |              |               |                          |                  |                            |
|------------------------------------------------------------------------------------------------------------------------|------------------------------------------------|--------------|---------------|--------------------------|------------------|----------------------------|
| Variables<br>Fixed effects + (Random effects)                                                                          | df                                             | Satisfaction | Task conflict | Relationship<br>conflict | Process Conflict | Communication<br>frequency |
| Treatment + Sex + Ethnicity + GPA + Year + Week                                                                        | 8                                              | 3667         | 3068          | 1988                     | 3120             | 4223                       |
| Treatment + Sex + Ethnicity + GPA + Year + Week + (StudentID) + (Lab-section)                                          | 10                                             | 3476         | 2745          | 1725                     | 2970             | 3855                       |
| Treatment + Sex + Ethnicity + GPA + Year + Week + (Lab-section)                                                        | 9                                              | 3660         | 3071          | 1988                     | 3128             | 4203                       |
| Treatment + Sex + Ethnicity + GPA + Year + Week + (StudentID)                                                          | 9                                              | 3487         | 2749          | 1732                     | 2975             | 3865                       |
| Selected the model with the lowest AIC from above 4 models as a parsimonious model                                     |                                                |              |               |                          |                  |                            |
| Removed the fixed effects in a backward fashion starting with the factor with the smallest effect from the above model |                                                |              |               |                          |                  |                            |
| If the AIC value decreased, the effect was removed from the model                                                      |                                                |              |               |                          |                  |                            |
| If the AIC value increased, the effect was added back into the model                                                   |                                                |              |               |                          |                  |                            |
| <b>Outcome</b>                                                                                                         | <b>Final mixed effect model description</b>    |              |               |                          |                  |                            |
| Satisfaction                                                                                                           | Week + GPA + (StudentID) + (Lab-section)       |              |               |                          |                  |                            |
| Task Conflict                                                                                                          | Sex + Week + GPA + (StudentID) + (Lab-section) |              |               |                          |                  |                            |
| Relationship Conflict                                                                                                  | Week + GPA + (StudentID) + (Lab-section)       |              |               |                          |                  |                            |
| Process Conflict                                                                                                       | Ethnicity + GPA + (StudentID) + (Lab-section)  |              |               |                          |                  |                            |
| Communication Frequency                                                                                                | GPA + (StudentID) + (Lab-section)              |              |               |                          |                  |                            |

Note: Treatment is Structured/Unstructured labs

Note: Please refer to Theobald (2018) for a detailed description of model selection method

**Table S5: Linear mixed model fit examining the effect of fixed and random variables on the satisfaction, conflict, and communication frequency scores.**

| <b>Satisfaction score</b>          |                |                      |                 |                   |                 |
|------------------------------------|----------------|----------------------|-----------------|-------------------|-----------------|
| <b>Random effect</b>               |                | <b>Fixed Effects</b> |                 |                   |                 |
| <b>Variance</b>                    | <b>Std.Dev</b> |                      | <b>Estimate</b> | <b>Std. Error</b> | <b>t -value</b> |
| Student ID                         |                | Intercept            | 3.62            | 0.32              | 11.30           |
| 0.28                               | 0.53           | Week                 | 0.08            | 0.02              | 3.95            |
| Lab sections                       |                | GPA                  | 0.06            | 0.08              | 0.81            |
| 0.03                               | 0.17           |                      |                 |                   |                 |
| <b>Task Conflict score</b>         |                |                      |                 |                   |                 |
| Student ID                         |                | Intercept            | 2.30            | 0.27              | 8.5             |
| 0.24                               | 0.49           | Biological Sex       | 0.11            | 0.05              | 2.11            |
| Lab sections                       |                | Week                 | -0.11           | 0.01              | -7.32           |
| 0.01                               | 0.12           | GPA                  | 0.03            | 0.07              | 0.05            |
| <b>Relationship Conflict score</b> |                |                      |                 |                   |                 |
| Student ID                         |                | Intercept            | 1.15            | 0.18              | 6.30            |
| 0.10                               | 0.31           | Week                 | 0.03            | 0.01              | 2.94            |
| Lab sections                       |                | GPA                  | -0.04           | 0.04              | -1.00           |
| 0.008                              | 0.09           |                      |                 |                   |                 |
| <b>Process Conflict score</b>      |                |                      |                 |                   |                 |
| Student ID                         |                | Intercept            | 1.30            | 0.24              | 5.25            |
| 0.18                               | 0.42           | Ethnicity            | 0.06            | 0.02              | 2.50            |
| Lab sections                       |                | GPA                  | -0.02           | 0.07              | 0.27            |
| 0.015                              | 0.12           |                      |                 |                   |                 |
| <b>Communication frequency</b>     |                |                      |                 |                   |                 |
| Student ID                         |                | Intercept            | 10.32           | 0.38              | 26.67           |
| 0.57                               | 0.75           | GPA                  | 0.02            | 0.11              | 0.17            |
| Lab sections                       |                |                      |                 |                   |                 |
| 0.05                               | 0.23           |                      |                 |                   |                 |

**t-tests use Satterthwaite's method**



| <b>Table S6 - Mean, SD, and median values for satisfaction, discussion, conflict scores, and final grades in structured and unstructured labs</b> |                     |      |        |                          |      |        |               |      |        |
|---------------------------------------------------------------------------------------------------------------------------------------------------|---------------------|------|--------|--------------------------|------|--------|---------------|------|--------|
| <b>Lab</b>                                                                                                                                        | <b>Week 5</b>       |      |        | <b>Week 6</b>            |      |        | <b>Week 7</b> |      |        |
|                                                                                                                                                   | Mean                | SD   | Median | Mean                     | SD   | Median | Mean          | SD   | Median |
| <b>(a) Satisfaction score</b>                                                                                                                     |                     |      |        |                          |      |        |               |      |        |
| Structured                                                                                                                                        | 4.28                | 1.06 | 5      | 4.38                     | 0.94 | 5      | 4.44          | 0.93 | 5      |
| Unstructured                                                                                                                                      | 4.31                | 1.04 | 5      | 4.38                     | 0.91 | 5      | 4.49          | 0.77 | 5      |
| <b>(b) Task conflict score</b>                                                                                                                    |                     |      |        |                          |      |        |               |      |        |
| Structured                                                                                                                                        | 1.74                | 0.79 | 2      | 1.72                     | 0.78 | 2      | 1.45          | 0.69 | 1      |
| Unstructured                                                                                                                                      | 1.73                | 0.78 | 2      | 1.78                     | 0.87 | 2      | 1.56          | 0.77 | 1      |
| <b>(c) Relationship conflict score</b>                                                                                                            |                     |      |        |                          |      |        |               |      |        |
| Structured                                                                                                                                        | 1.14                | 0.49 | 1      | 1.21                     | 0.56 | 1      | 1.2           | 0.58 | 1      |
| Unstructured                                                                                                                                      | 1.12                | 0.41 | 1      | 1.23                     | 0.59 | 1      | 1.19          | 0.59 | 1      |
| <b>(d) Process conflict score</b>                                                                                                                 |                     |      |        |                          |      |        |               |      |        |
| Structured                                                                                                                                        | 1.40                | 0.68 | 1      | 1.41                     | 0.65 | 1      | 1.28          | 0.56 | 1      |
| Unstructured                                                                                                                                      | 1.38                | 0.66 | 1      | 1.54                     | 0.83 | 1      | 1.42          | 0.81 | 1      |
| <b>(f) Final grades</b>                                                                                                                           |                     |      |        |                          |      |        |               |      |        |
| <b>Lab</b>                                                                                                                                        | <b>Group grades</b> |      |        | <b>Individual grades</b> |      |        |               |      |        |
|                                                                                                                                                   | Mean                | SD   | Median | Mean                     | SD   | Median |               |      |        |
| Structured                                                                                                                                        | 0.94                | 0.03 | 0.95   | 0.94                     | 0.05 | 0.95   |               |      |        |
| Unstructured                                                                                                                                      | 0.90                | 0.10 | 0.93   | 0.90                     | 0.11 | 0.92   |               |      |        |

| <b>Table S7: Model selection for the effect of structure and unstructured lab settings as a predictor for communication frequency and shared workload during weeks 1 to 4</b> |    |                                        |                         |
|-------------------------------------------------------------------------------------------------------------------------------------------------------------------------------|----|----------------------------------------|-------------------------|
| <b>Model Description</b>                                                                                                                                                      |    | <b>Outcomes- Week 1-4 (AIC values)</b> |                         |
| Variables<br>Fixed effects + (Random effects)                                                                                                                                 | df | Shared workload score                  | Communication frequency |
| Treatment + Week                                                                                                                                                              | 4  | 3437                                   | 7045                    |
| Treatment + Week + (StudentID) + (Lab-section)                                                                                                                                | 6  | 3229                                   | 6839                    |

|                                                                                                                        |   |      |      |
|------------------------------------------------------------------------------------------------------------------------|---|------|------|
| Treatment + Week + (Lab-section)                                                                                       | 5 | 3277 | 7021 |
| Treatment + Week + (StudentID)                                                                                         | 5 | 3372 | 6858 |
| Selected the model with the lowest AIC as a parsimonious model                                                         |   |      |      |
| Removed the fixed effects in a backward fashion starting with the factor with the smallest effect from the above model |   |      |      |
| Selected a parsimonious model                                                                                          |   |      |      |
| Final model: Outcome ~ Week+ (StudentID) + (Lab-section)                                                               |   |      |      |

**Table S8: Mixed Level model examining the effect of structure and unstructured lab settings on the communication frequency and shared workload during weeks 1 to 4**

| Communication frequency |         |               |          |            |          |
|-------------------------|---------|---------------|----------|------------|----------|
| Random effects          |         | Fixed Effects |          |            |          |
| Variance                | Std.Dev |               | Estimate | Std. Error | t -value |
| StudentID               |         | Intercept     | 9.68     | 0.08       | 119.6    |
| 0.48                    | 0.69    | Week          | 0.11     | 0.02       | 5.48     |
| Lab sections            |         |               |          |            |          |
| 0.05                    | 0.24    |               |          |            |          |
| Shared workload score   |         |               |          |            |          |
| StudentID               |         | Intercept     | 4.58     | 0.03       | 130.6    |
| 0.05                    | 0.23    | Week          | 0.01     | 0.008      | 1.98     |
| Lab sections            |         |               |          |            |          |
| 0.01                    | 0.12    |               |          |            |          |

**Table S9 - Mean, SD and median values for communication frequencies in structured and unstructured labs**

| Weeks  | Structured Labs |      |        | Unstructured labs |      |        |
|--------|-----------------|------|--------|-------------------|------|--------|
|        | Mean            | SD   | Median | Mean              | SD   | Median |
| Week 1 | 9.88            | 1.33 | 10     | 9.77              | 1.42 | 10     |
| Week 2 | 9.79            | 1.30 | 10     | 9.98              | 1.28 | 10     |
| Week 3 | 10.03           | 1.24 | 10     | 10.02             | 1.32 | 10     |
| Week 4 | 10.07           | 1.25 | 11     | 10.30             | 1.11 | 11     |
| Week 5 | 10.38           | 1.12 | 11     | 10.36             | 1.09 | 11     |
| Week 6 | 10.40           | 1.20 | 11     | 10.40             | 0.99 | 11     |
| Week 7 | 10.41           | 1.12 | 11     | 10.42             | 0.94 | 11     |

**Table S10 - Mean, SD, and median values for shared workload in structured and unstructured labs over the period of the first four weeks**

| Weeks  | Structured Labs |      |        | Unstructured labs |      |        |
|--------|-----------------|------|--------|-------------------|------|--------|
|        | Mean            | SD   | Median | Mean              | SD   | Median |
| Week 1 | 4.61            | 0.46 | 4.66   | 4.62              | 0.44 | 4.67   |
| Week 2 | 4.57            | 0.58 | 4.67   | 4.63              | 0.57 | 5.00   |
| Week 3 | 4.60            | 0.55 | 4.67   | 4.66              | 0.47 | 5.00   |
| Week 4 | 4.61            | 0.59 | 5.00   | 4.72 *            | 0.45 | 5.00   |

## Appendix 1- Survey items

### A) Demographics Questions as a part of the survey in week 1

In order to understand the different characteristics that you use to form groups, please provide some details about yourself in the questions below.

1. Please indicate your gender
  - Male
  - Female
  - other \_\_\_\_\_
  - prefer not to respond
2. With which race(s) and ethnicity/ies do you most closely identify? Please choose all that apply.
  - a. African American or Black
  - b. American Indian or Alaskan Native
  - c. Asian Indian
  - d. Chinese
  - e. Filipino
  - f. Japanese
  - g. Korean
  - h. Latina / Latino or Hispanic
  - i. Native Hawaiian or Other Pacific Islander
  - j. Vietnamese
  - k. White
  - l. Other - please explain:  
\_\_\_\_\_
  - m. Prefer not to respond
3. Please indicate your class standing in college.
  - freshman (0-30 hours)
  - sophomore (31-60 hours)
  - junior (61-90 hours)
  - senior (above 90 hours)
4. Please indicate your current cumulative college GPA (e.g 3.87 or 3.25).  
\_\_\_\_\_

### B) Survey distributed during weeks 1-4 to collect information

1. Please select the students with whom you worked in the lab today. {List just contains the students in that lab section}
2. {Populated question with the answers from question 1}  
For each student that you worked with today, select those that you consider a pre-class

friend: A student that you would consider a friend from BEFORE the term of this class. If you have met someone in this class that you would consider a friend now but not before this class, do not select them as a pre-class friend.

3. {Populated question with the answers from question 1}

For each student that you worked with in lab today, rank how well you felt they shared the workload as a group member: shared workload includes discussing ideas, using equipment, recording data, presenting your group's ideas, asking relevant questions, etc.

|                  | very poor             | poor                  | moderate              | good                  | very good             |
|------------------|-----------------------|-----------------------|-----------------------|-----------------------|-----------------------|
| (Group Member 1) | <input type="radio"/> |
| (Group Member 2) | <input type="radio"/> |
| (Group Member 3) | <input type="radio"/> |

4. Indicate the frequency or communication between members of your group in the lab today.

-5 indicates extremely rare communication (several members did not talk at all)

0 indicates average level of communication.

+5 indicates very frequent communication (all students communicated throughout lab)

5. Please provide at least two traits you used (or would use) to identify someone as a good group member.

6. Please provide at least two traits you used (or would use) to identify someone as a poor group member.

7. For each of the students that you worked with today, select only those that you would like to work with again.

8. What factored into your decision for the last question? {Populated with individual students}

a. Positive Options:

Well prepared for class & knows the material well in advance.

Pays attention.

Participates in discussion and offers meaningful suggestions.

b. Negative Options:

Does not come to class prepared or does not know the material in advance.

Does not seem interested in the class.

Does not participate in discussions / listen to others.

### **C) Survey distributed during weeks 5-7 to collect information**

1. Select the members of the group that you will be working with for the next few lab sessions: {List just contains the students in that lab section}
2. {Populated question with the answers from question 1}  
Please indicate which of these students was a pre-class friend.
3. In general, how would you rate your previous experience working in a group?
  - a. Extremely bad
  - b. Bad
  - c. Neutral
  - d. Good
  - e. Extremely Good
4. How do you feel your group worked today?
  - a. Extremely well
  - b. Well
  - c. Neutral
  - d. Poor
  - e. Extremely poor
5. Indicate the frequency or communication between members of your group in the lab today  
  
-5 indicates extremely rare communication (several members did not talk at all)  
0 indicates average level of communication.  
+5 indicates very frequent communication (all students communicated throughout lab)

#### **Group Satisfaction items**

6. I am satisfied with my present teammates (Select one)  
 Strongly agree  Agree  Neutral  Disagree  Strongly disagree
7. I am pleased with the way my teammates and I worked together today (Select one)  
 Strongly agree  Agree  Neutral  Disagree  Strongly disagree
8. I am very satisfied working with this team (Select one)  
 Strongly agree  Agree  Neutral  Disagree  Strongly disagree
9. What is your biggest concern working in a group? Please explain.

#### **Group Conflict items - Task Conflict**

10. How much conflict of ideas is there in your work group? (Select one)  
 None/Not at all  Little/Rarely  Some  Much/Often  Very Much/Very Often
11. How often do people in your work group have conflicting opinions about the project you are working on? (Select one)  
 None/Not at all  Little/Rarely  Some  Much/Often  Very Much/Very Often

12. How often are there disagreements about who should do what in your work group?

(Select one)

- None/Not at all  Little/Rarely  Some  Much/Often  Very Much/Very Often

**Group Conflict items – Relationship Conflict**

13. How much relationship tension is there in your work group?

- None/Not at all  Little/Rarely  Some  Much/Often  Very Much/Very Often

14. How often do people get angry while working in your group?

- None/Not at all  Little/Rarely  Some  Much/Often  Very Much/Very Often

15. How much emotional conflict is there in your work group?

- None/Not at all  Little/Rarely  Some  Much/Often  Very Much/Very Often

**Group Conflict items –Process Conflict**

16. How frequently do you have disagreements within your work group about the task of the project you are working on?

- None/Not at all  Little/Rarely  Some  Much/Often  Very Much/Very Often

**Group Atmosphere items –Discussion of ideas**

17. How often do you have open discussion about these issues in your group?

- None/Not at all  Little/Rarely  Some  Much/Often  Very Much/Very Often
